# Supplementary material for: Machine learning predicts rapid relapse of triple negative breast cancer
Source: bioRxiv or medRxiv preprint supplement (doi:10.1101/613604), 2019-04-21

# Supplementary Figure 3

**A**

**Rapid Relapse n=48**

**Late Relapse n=104**

**No Relapse n=164**

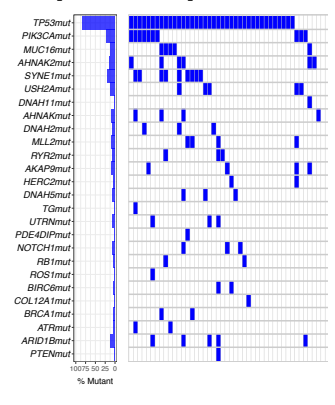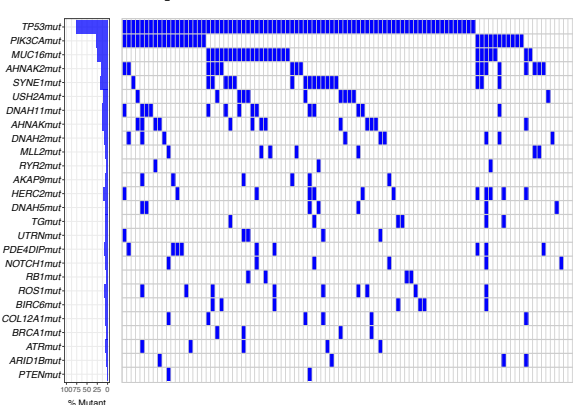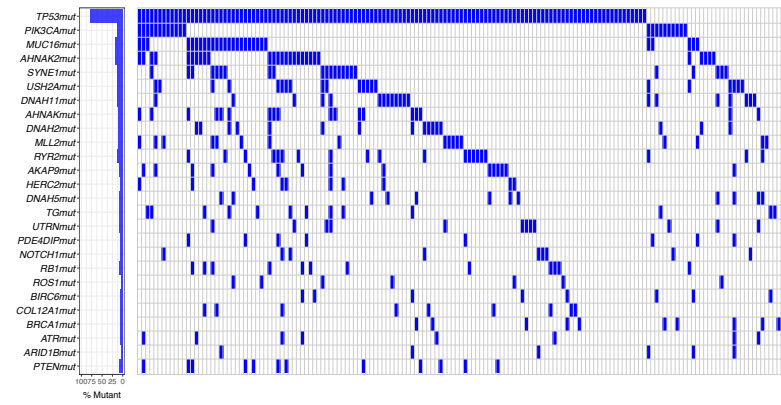

**B**

**Rapid Relapse n=48**

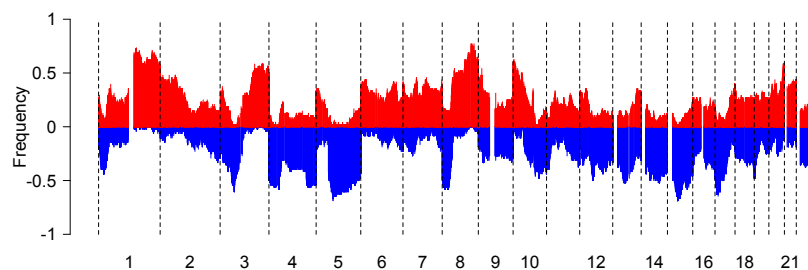

**Late Relapse n=104**

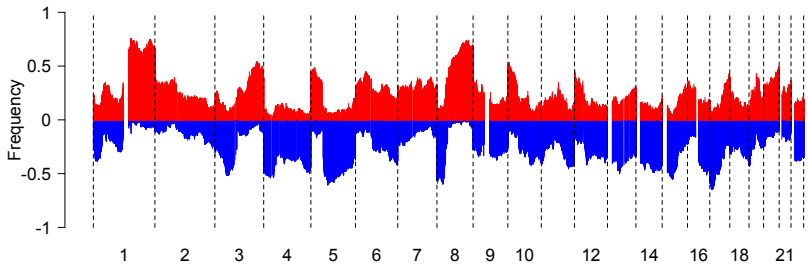

**No Relapse n=164**

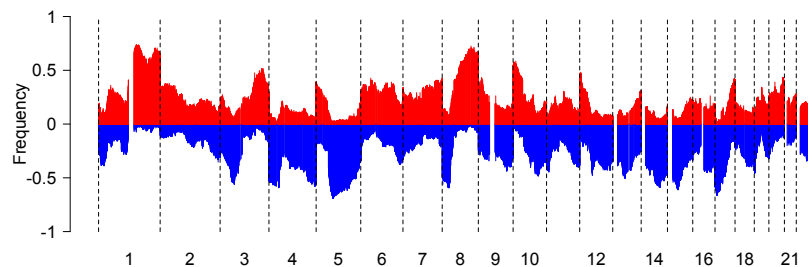

**C**

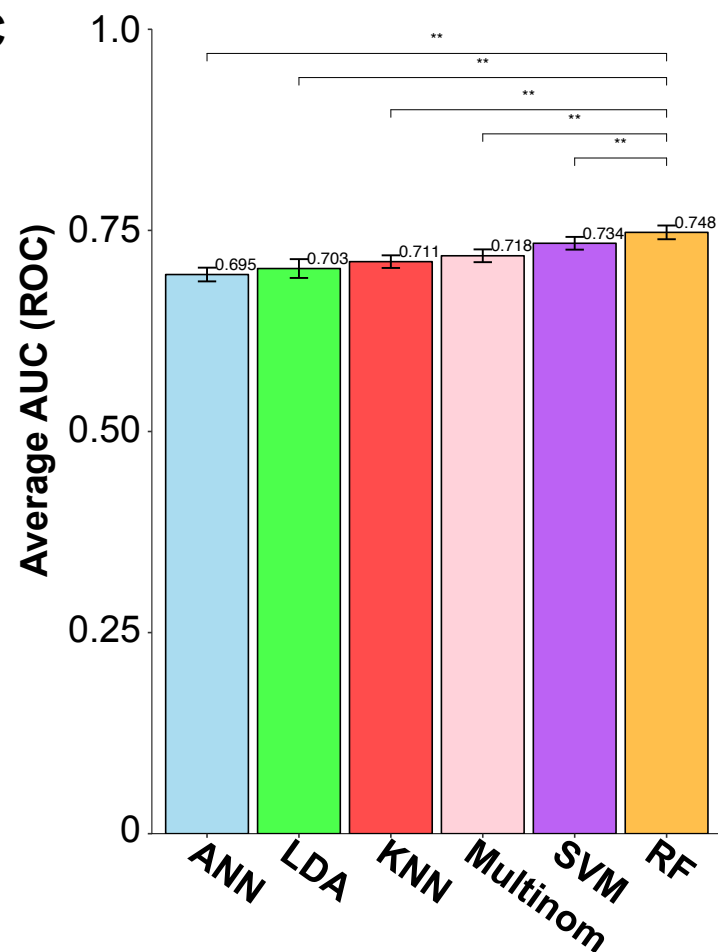

Supplement: Supplementary file [file media-3.pdf]
